# Supplementary material
Source: MDPI journal article supplement (https://www.mdpi.com/2227-9717/10/3/540)
Supplement: s1 [file s1]

Content summary

This supplementary material presents another visualisation of the particle size distributions values where measure error for each value is included.

Batch mode experimentations

Lactose host particle

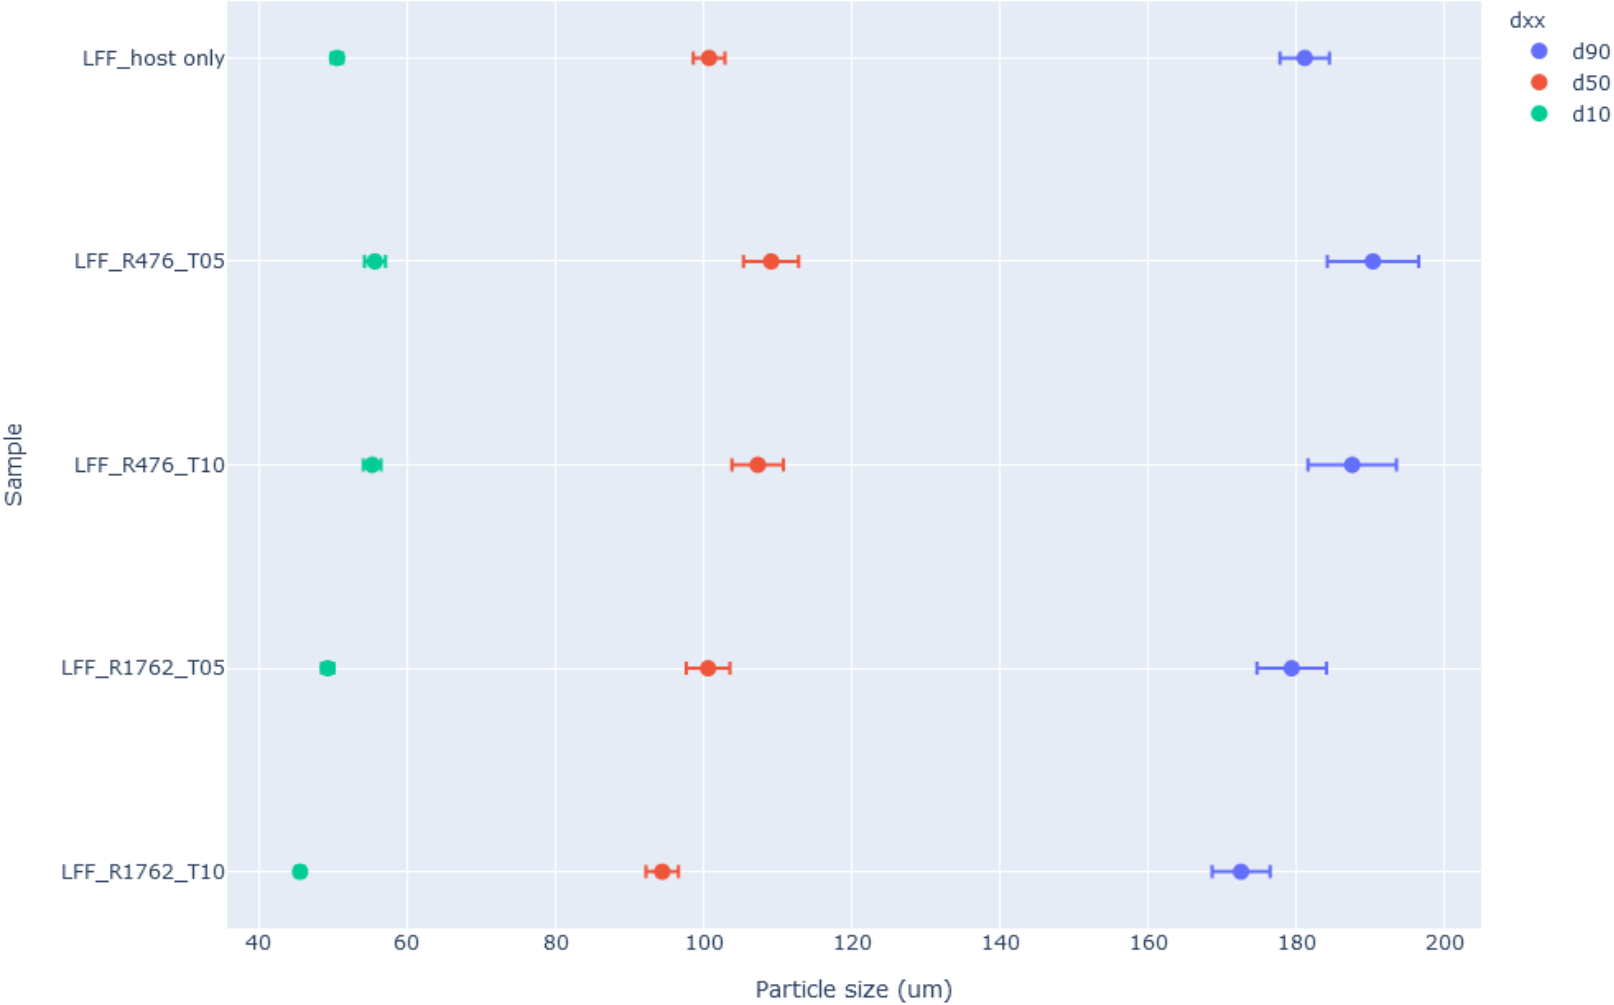

Figure S1.: Particle size d10, d50, and d90 values of LFF host only particles processed in a batch mode conical mill

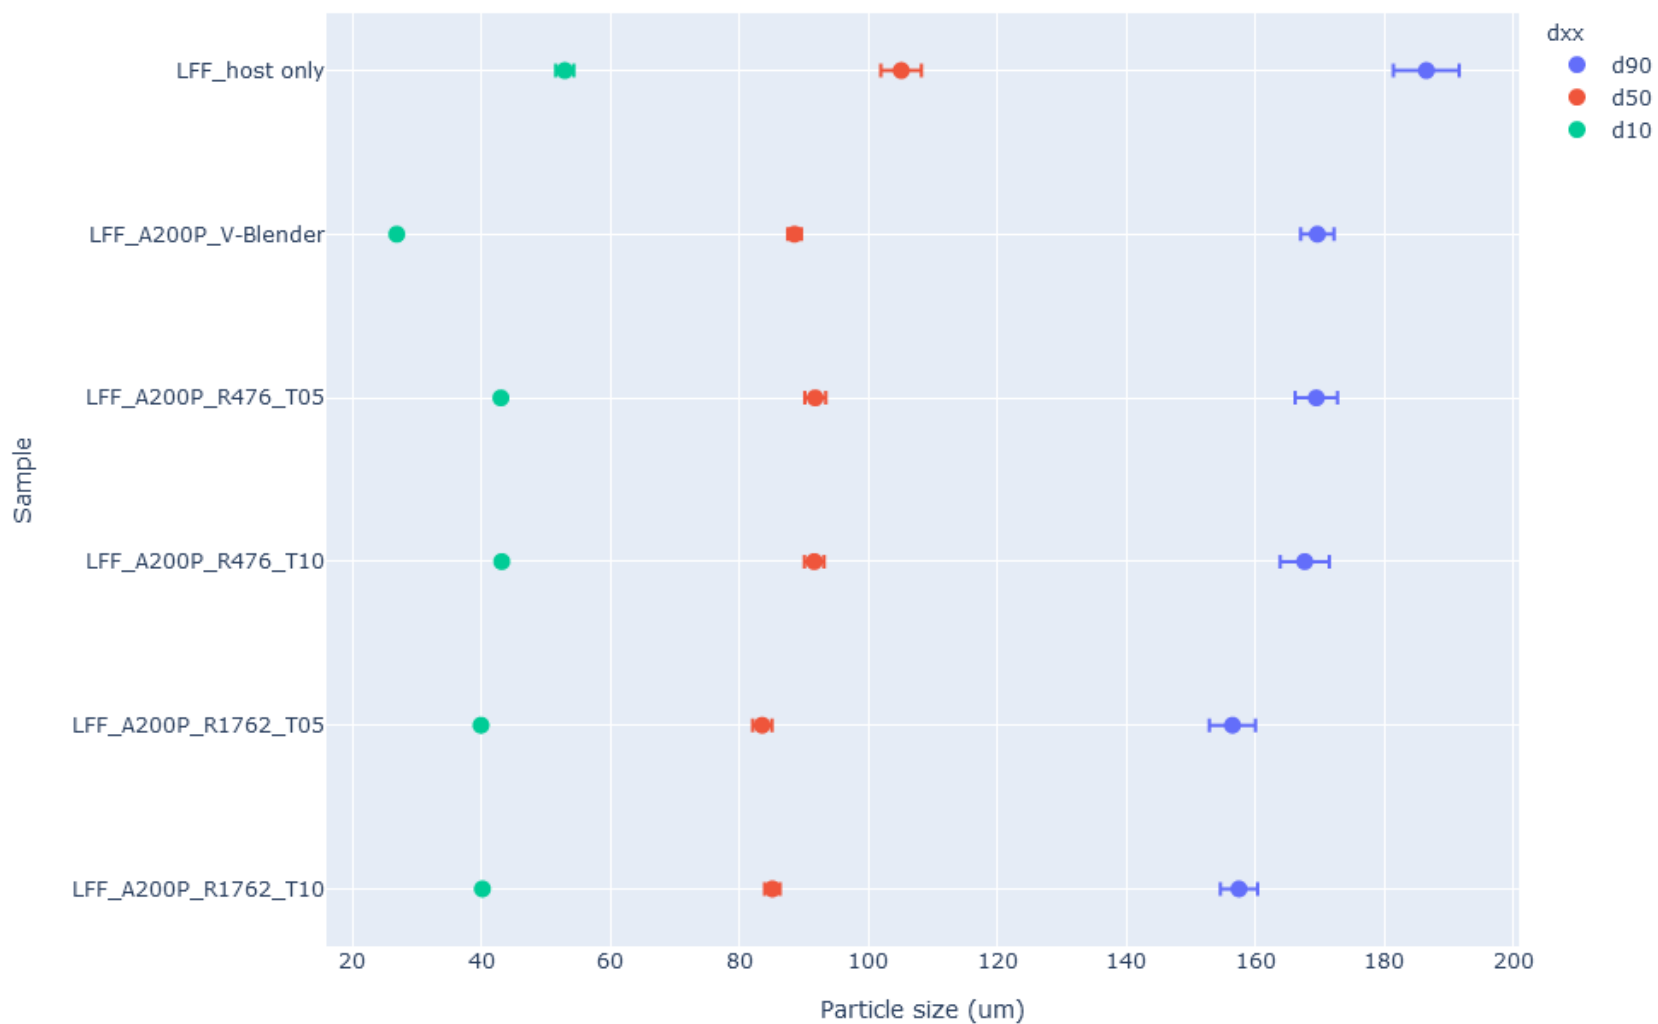

Figure S2.: Particle size d10, d50, and d90 values of LFF host with 1.0% A200P pre-processed in a V-blender then processed in a batch mode conical mill

MCC host particle

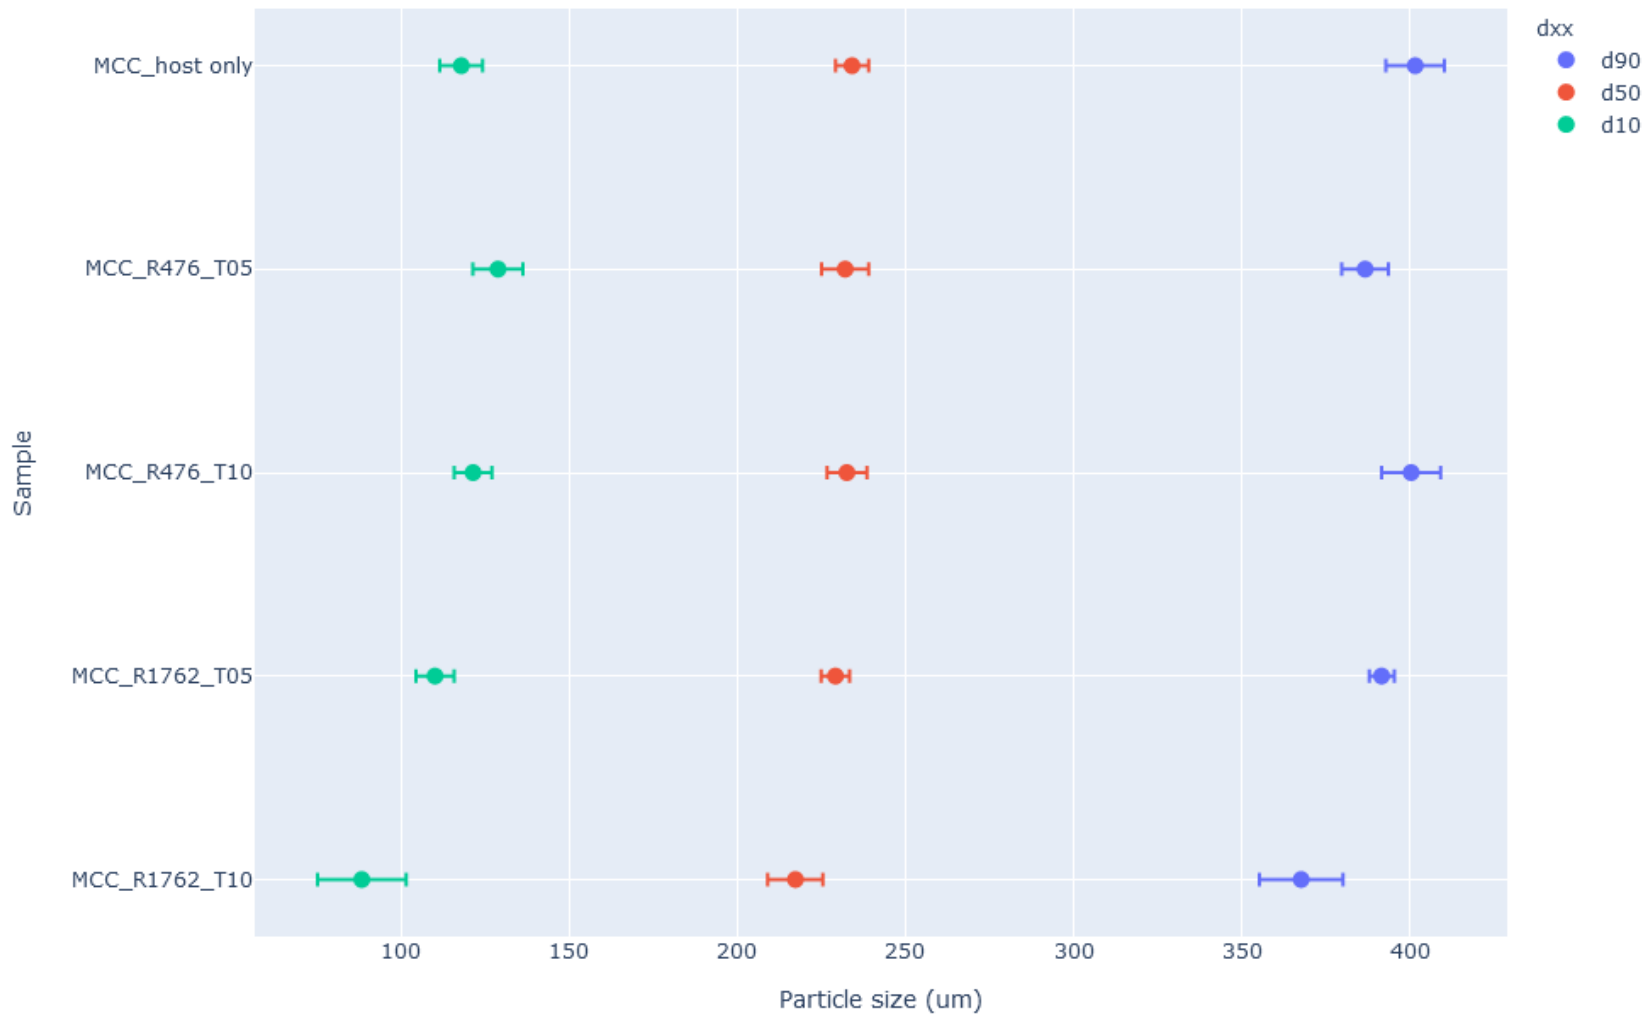

Figure S3.: Particle size d10, d50, and d90 values of MCC host only particles processed in a batch mode conical mill

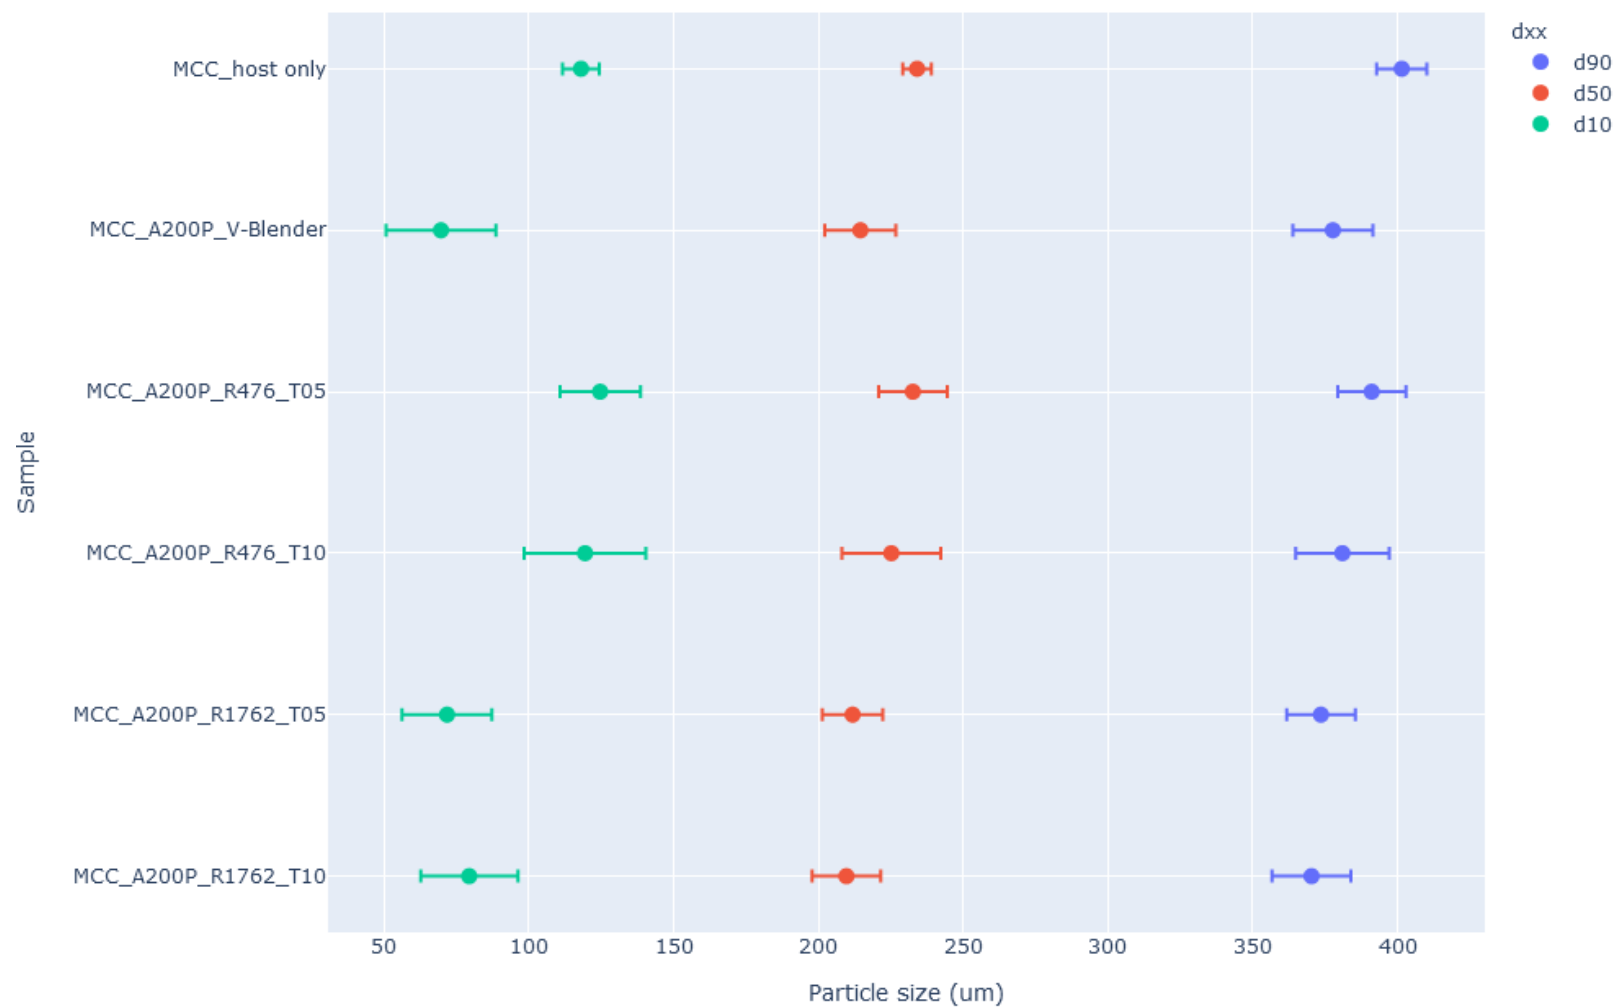

Figure S4.: Particle size d10, d50, and d90 values of MCC host with 1.0% A200P pre-processed in a V-blender then processed in a batch mode conical mill

Continuous mode experimentations

LFF host particle

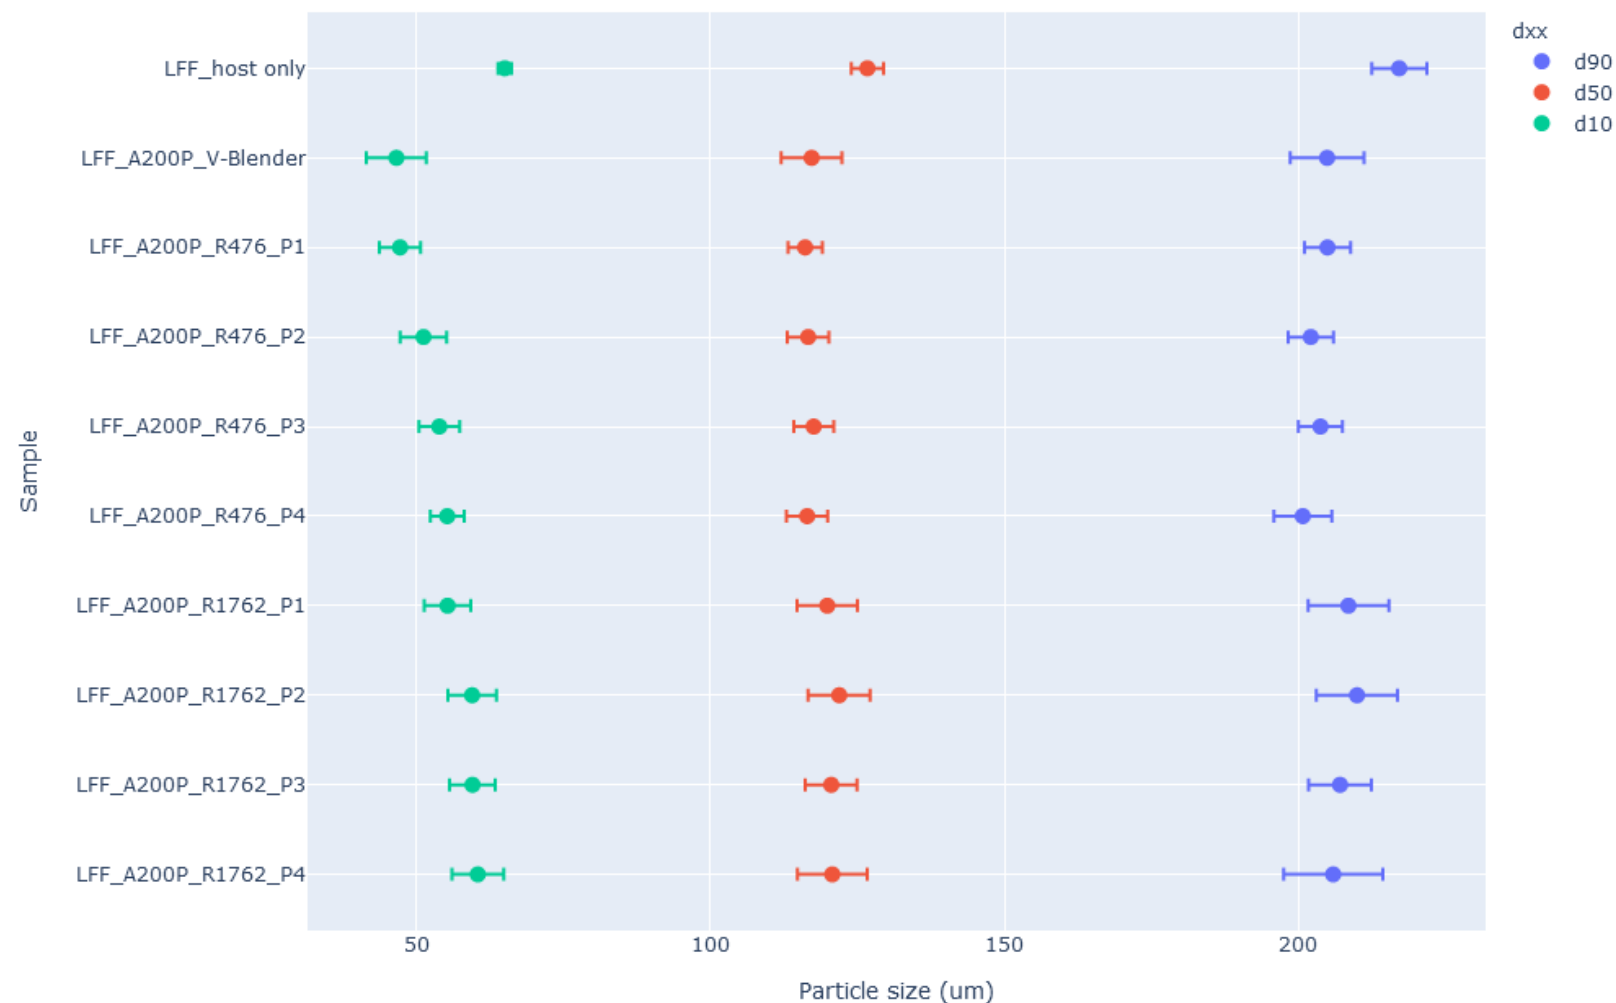

Figure S5.: Particle size d10, d50, and d90 values of LFF host with 1.0% A200P pre-processed in a V-blender then processed in a continuous mode conical mill

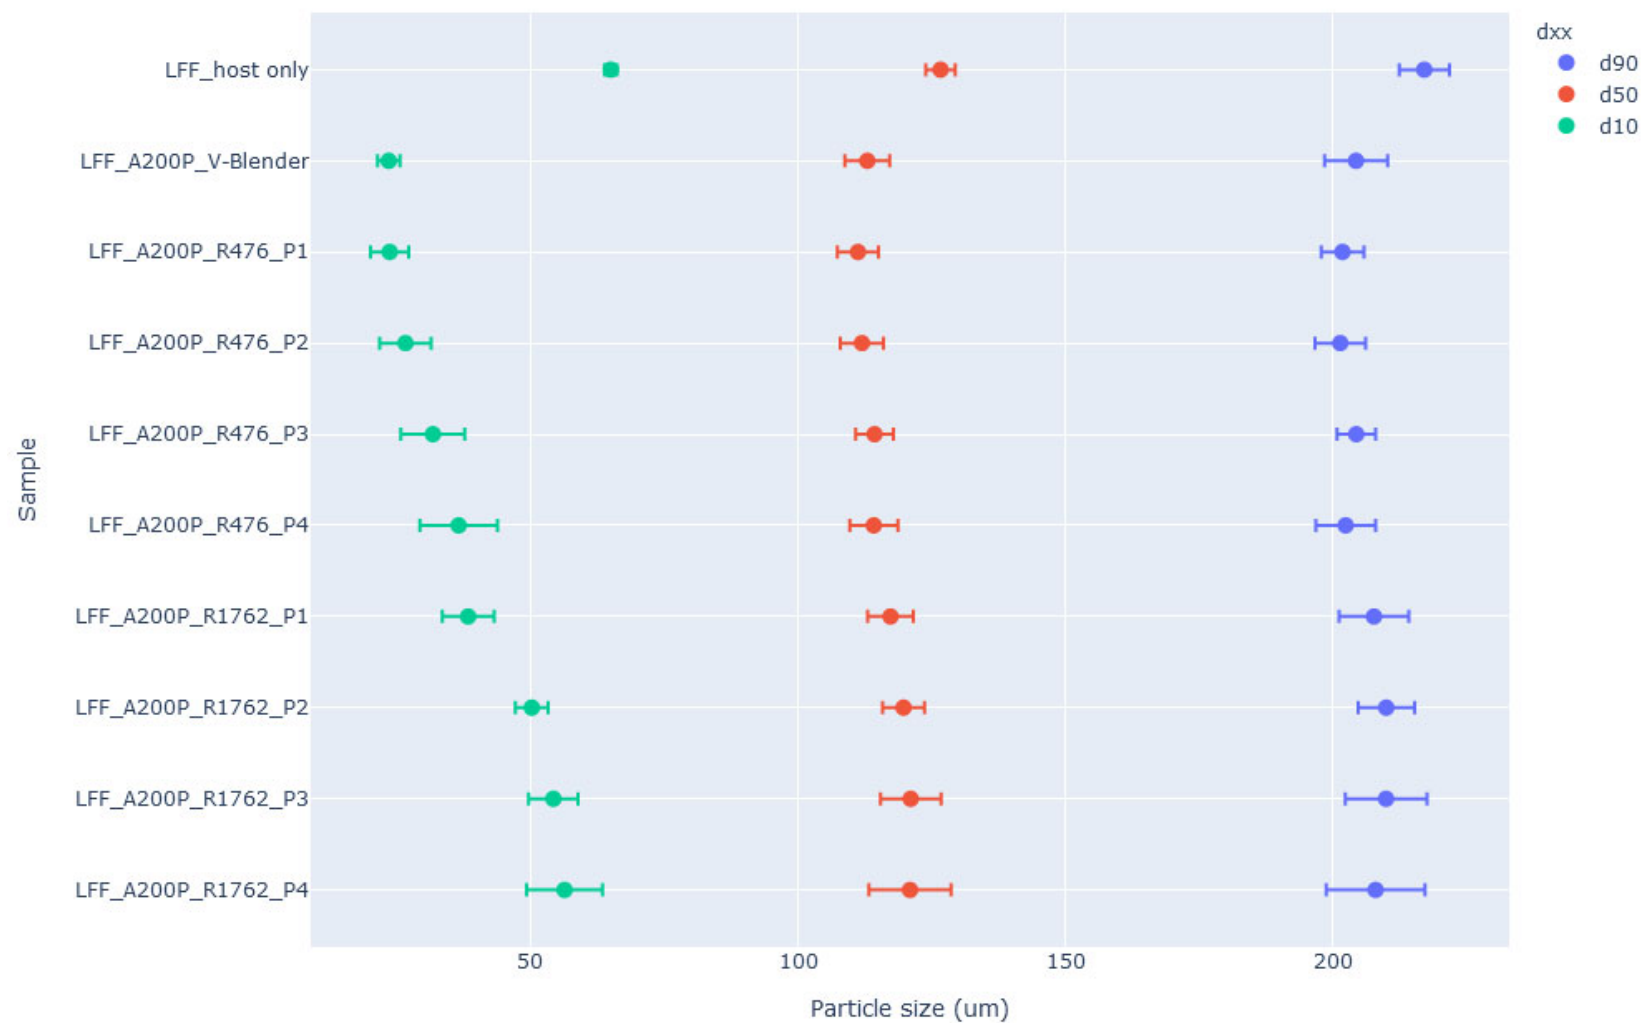

Figure S6.: Particle size d10, d50, and d90 values of LFF host with 1.5% A200P pre-processed in a V-blender then processed in a continuous mode conical mill

MCC host particle

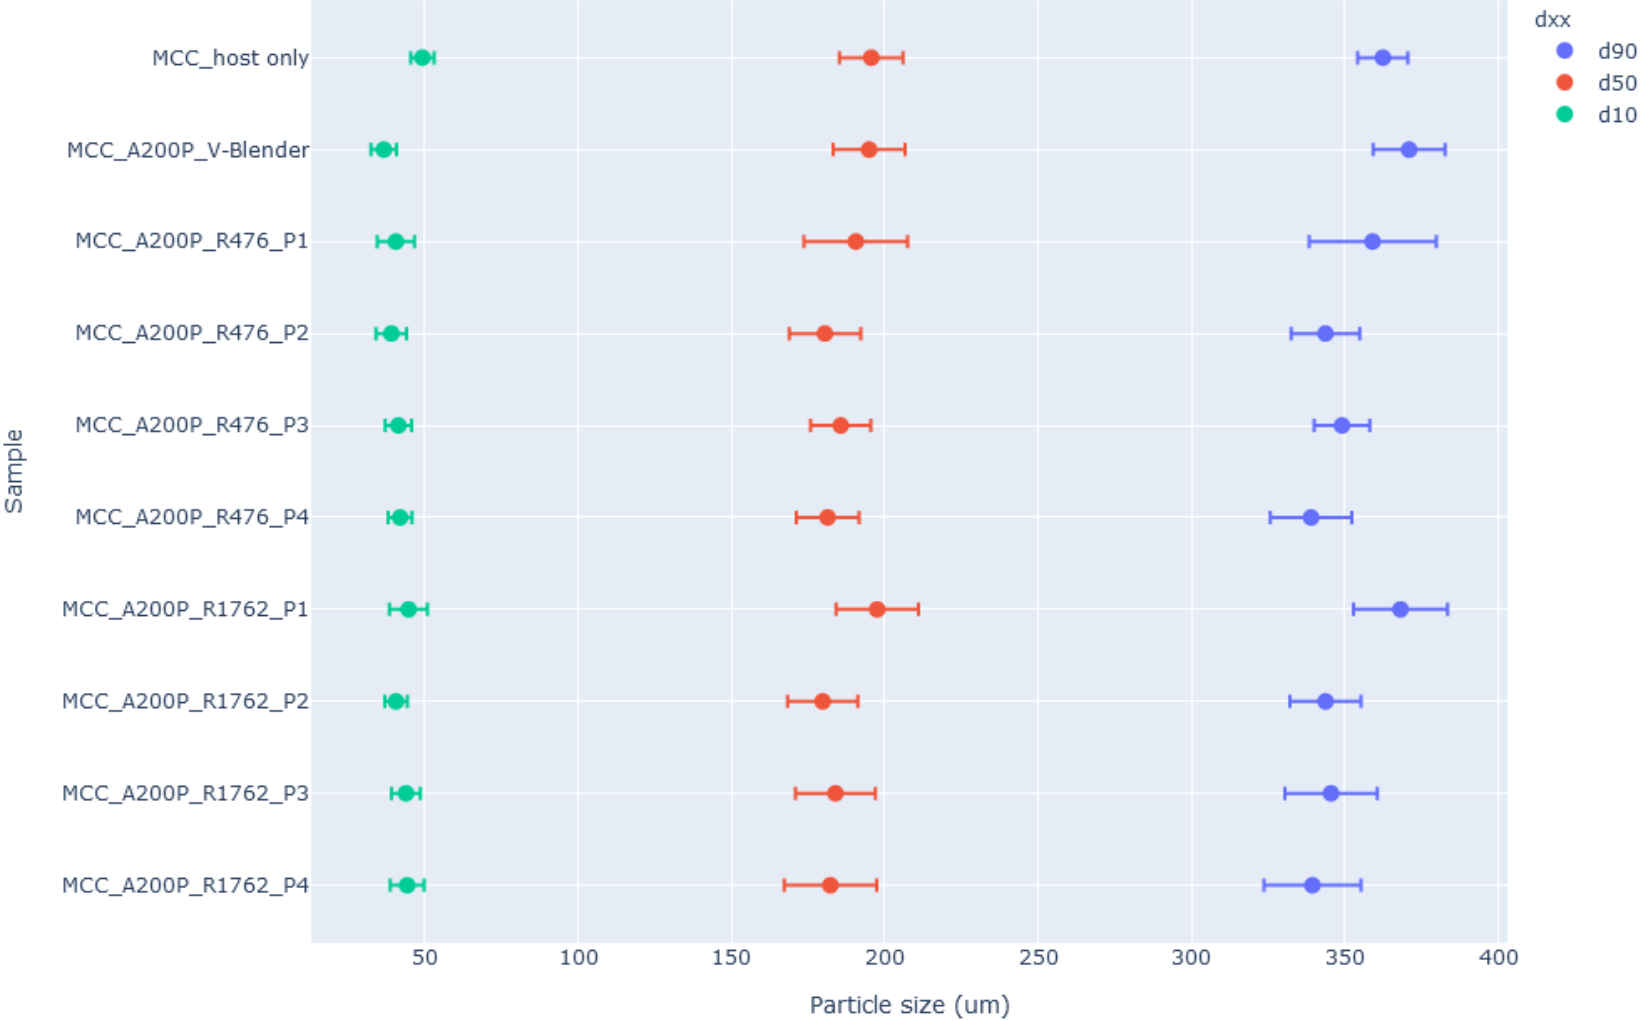

Figure S7.: Particle size d10, d50, and d90 values of MCC host with 1.0% A200P pre-processed in a V-blender then processed in a continuous mode conical mill

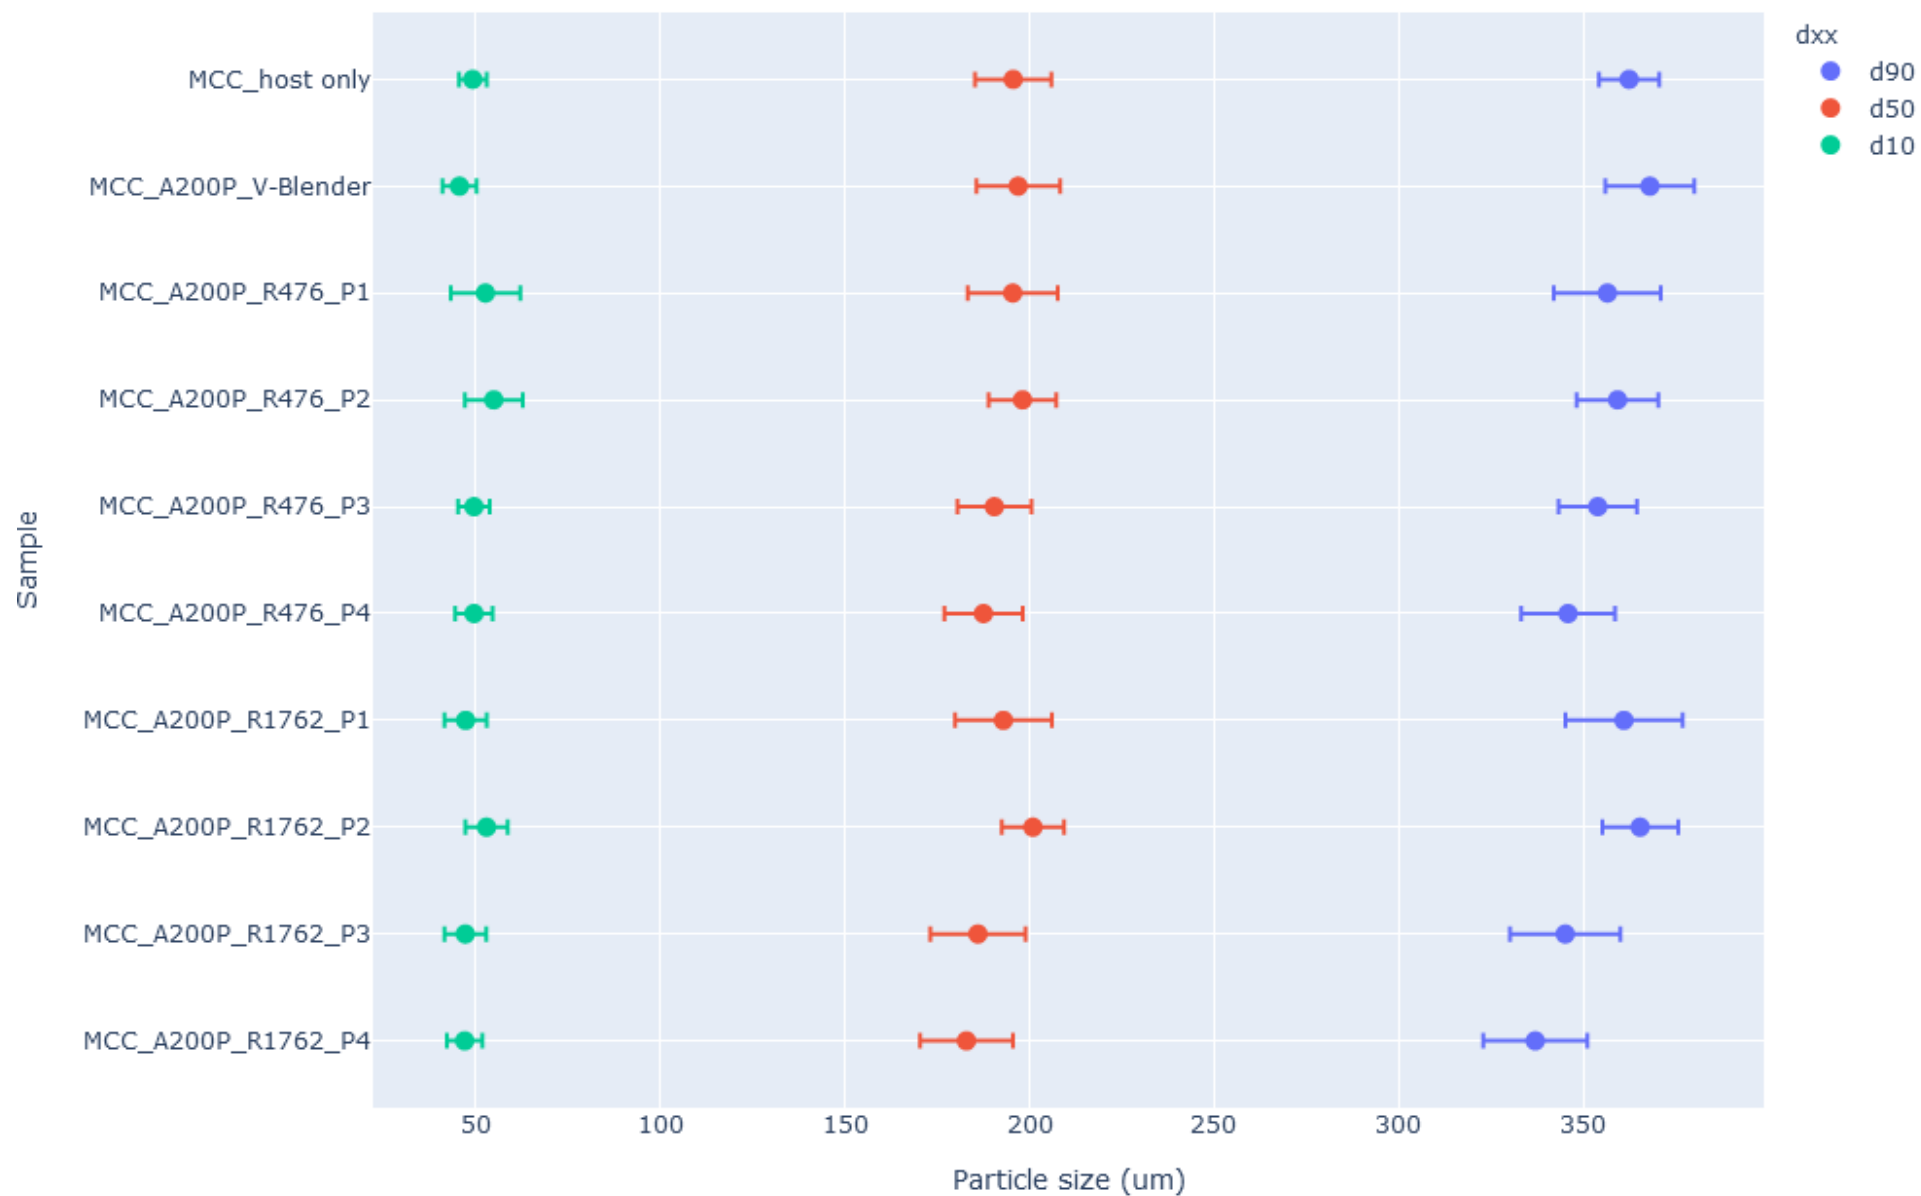

Figure S8.: Particle size d10, d50, and d90 values of MCC host with 0.5% A200P pre-processed in a V-blender then processed in a continuous mode conical mill
